# Supplementary material
Source: bioRxiv or medRxiv preprint supplement (https://medrxiv.org/highwire/filestream/83885/field_highwire_adjunct_files/0/2020.05.31.20118554-1.pdf)
Supplement: Supplementary file [file 2020.05.31.20118554-1.pdf]

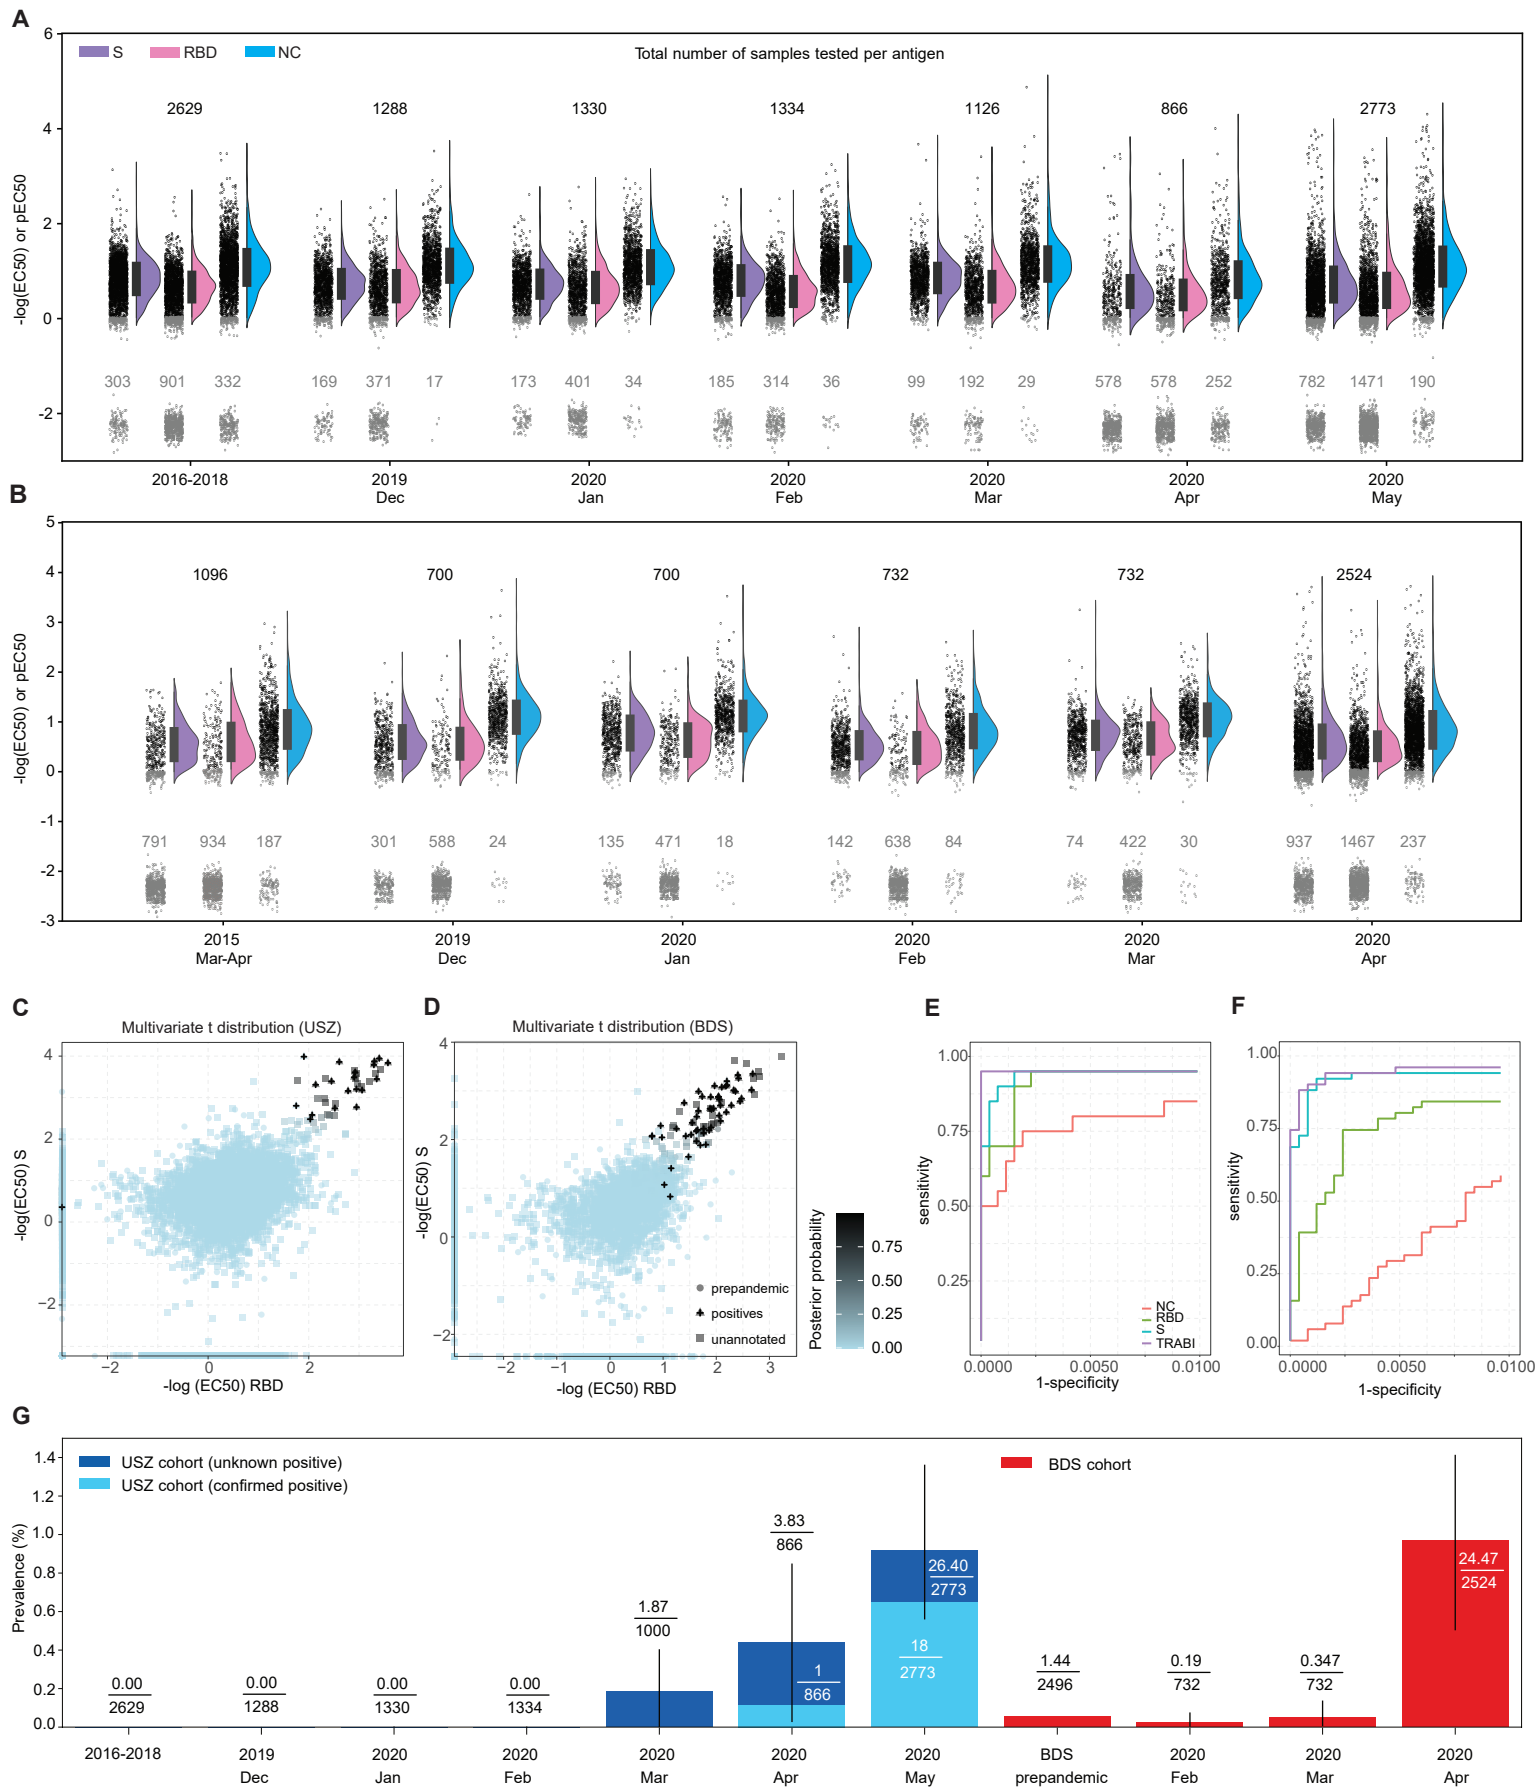

Fig. S1

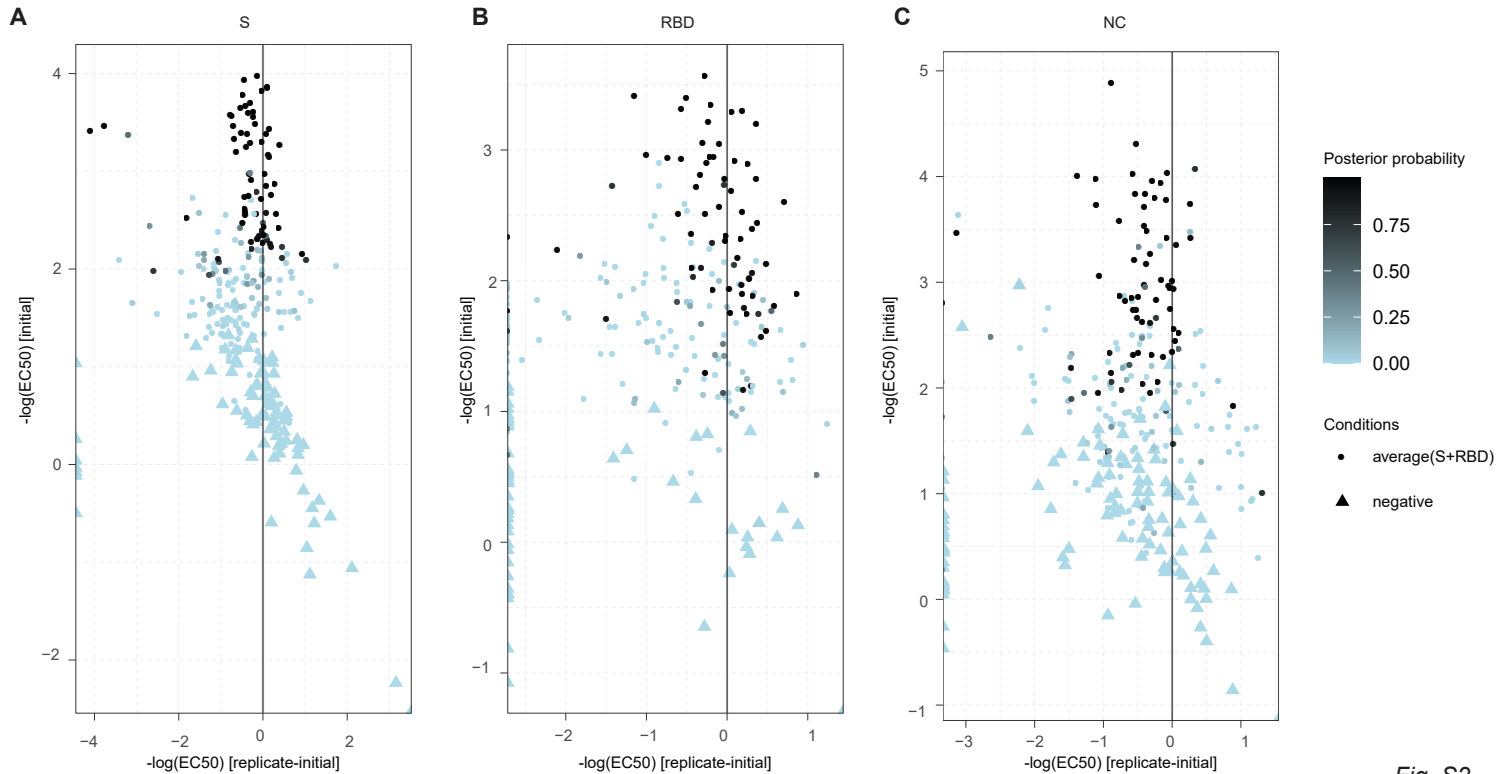

Fig. S2

### Immobilization with NC

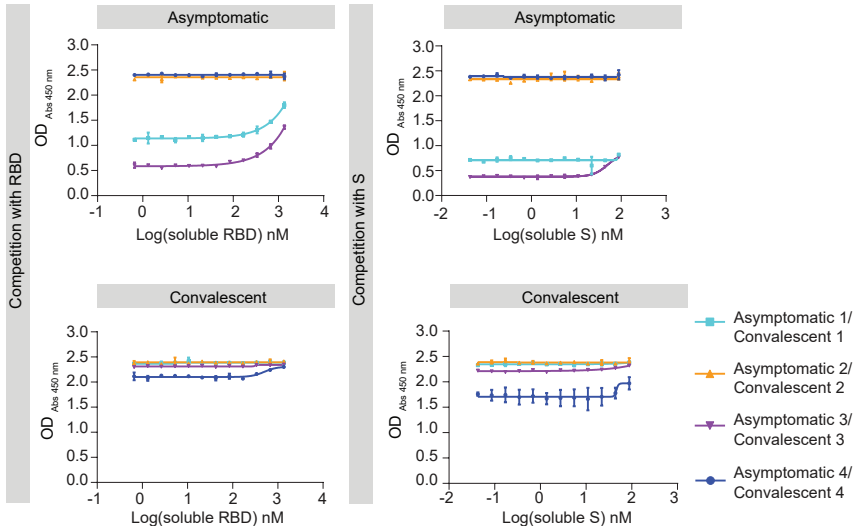

Fig. S3

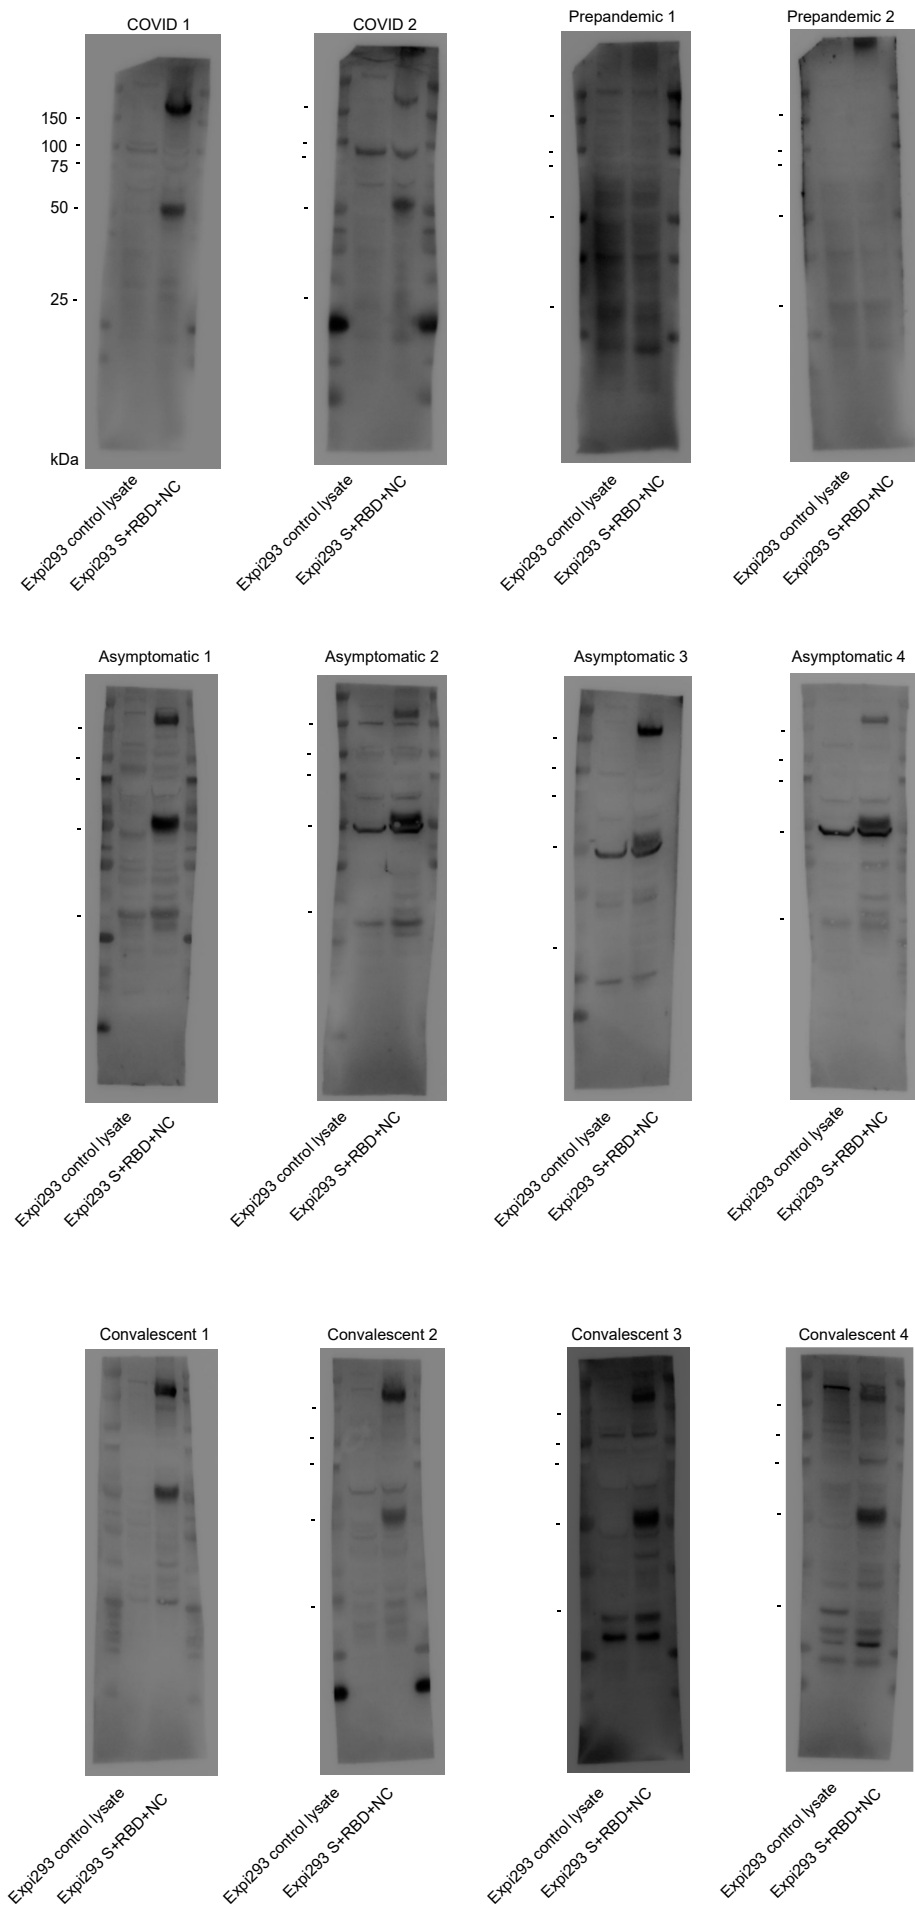

Fig. S4

| Cohort          | Characteristic            | P>0.5        |              |              | P≤0.5        |              |              | Total        |              |              |
|-----------------|---------------------------|--------------|--------------|--------------|--------------|--------------|--------------|--------------|--------------|--------------|
|                 |                           | M            | F            | Tot          | M            | F            | Tot          | M            | F            | Tot          |
| USZ Samples*    | Sample analysed - no.     | 30           | 14           | 44           | 5,701        | 4,944        | 10,645       | 5,731        | 4,958        | 10,689       |
|                 | Median Age (IQR) - yr.    | 58 (51 - 62) | 58 (40 - 62) | 58 (49 - 62) | 59 (45 - 70) | 53 (38 - 67) | 56 (41 - 69) | 59 (45 - 70) | 53 (38 - 67) | 56 (41 - 69) |
| USZ Patients    | Patient analysed -no.     | 24           | 14           | 38           | 5,206        | 4,566        | 9,772        | 5,230        | 4,580        | 9,810        |
|                 | Median Age (IQR) - yr.    | 59 (53 - 64) | 58 (40 - 62) | 59 (51 - 63) | 59 (45 - 70) | 52 (38 - 67) | 56 (41 - 69) | 59 (45 - 70) | 52 (38 - 67) | 56 (41 - 69) |
| BDS Samples**   | Sample analysed - no. (%) | 39           | 11           | 50           | 1,049        | 784          | 1,833        | 1,088        | 795          | 1,883        |
|                 | Median Age (IQR) - yr.    | 37 (25 - 49) | 42 (24 - 54) | 38 (24 - 51) | 46 (32 - 55) | 39 (26 - 52) | 43 (29 - 54) | 45 (32 - 55) | 39 (26 - 52) | 43 (29 - 54) |
| USZ test cohort | Sample analysed - no. (%) | 35           | 21           | 56           | -            | -            | 90           | -            | -            | 146          |
|                 | Median Age (IQR) - yr.    | 63 (52 - 67) | 70 (55 - 80) | 63 (53 - 73) | -            | -            | NA           | -            | -            | NA           |

\*10,689 / 11,220 samples with data (gender and age of the patient) available

\*\*Age and gender of 1,883 donors of April, May, and of convalescents available

IQR = interquartile range

Table S1
